# Supplementary material for: Inspired by mussel adhesive protein: hydrophilic cationic copoly(2-oxazoline)s carrying catecholic side chains
Source: Royal Society of Chemistry journal article supplement (doi:10.1039/d1py00679g), 2021-01-01
Supplement: d1py00679g1.pdf [file d1py00679g1.pdf]

Supporting Information

**Inspired by mussel adhesive protein:  
Hydrophilic cationic copoly(2-oxazoline)s carrying catecholic side chains**

Nils Lüdecke and Helmut Schlaad\*

*University of Potsdam, Institute of Chemistry,  
Karl-Liebknecht-Str. 24-25, 14476 Potsdam, Germany*

2-(3,4-Dimethoxybenzyl)-2-oxazoline.

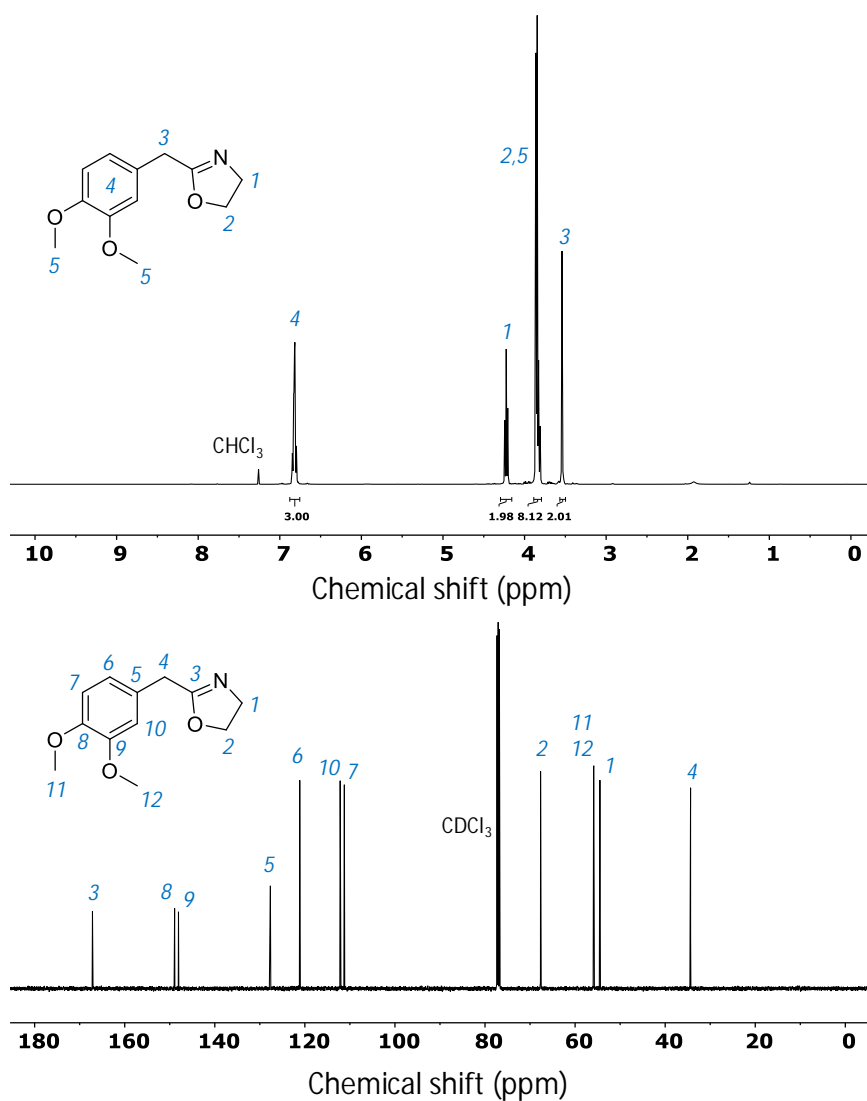

**Figure S1.** <sup>1</sup>H NMR (600 MHz) (top) and <sup>13</sup>C NMR (150 MHz) (bottom) spectra of 2-(3,4-dimethoxybenzyl)-2-oxazoline (**1c**) in CDCl<sub>3</sub>.

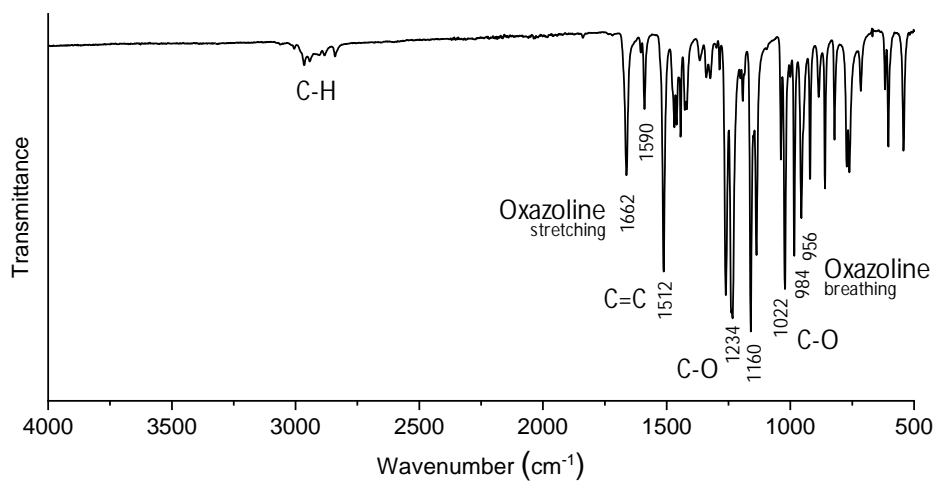

**Figure S2.** FT-IR (ATR) spectrum of 2-(3,4-dimethoxybenzyl)-2-oxazoline (**1c**).

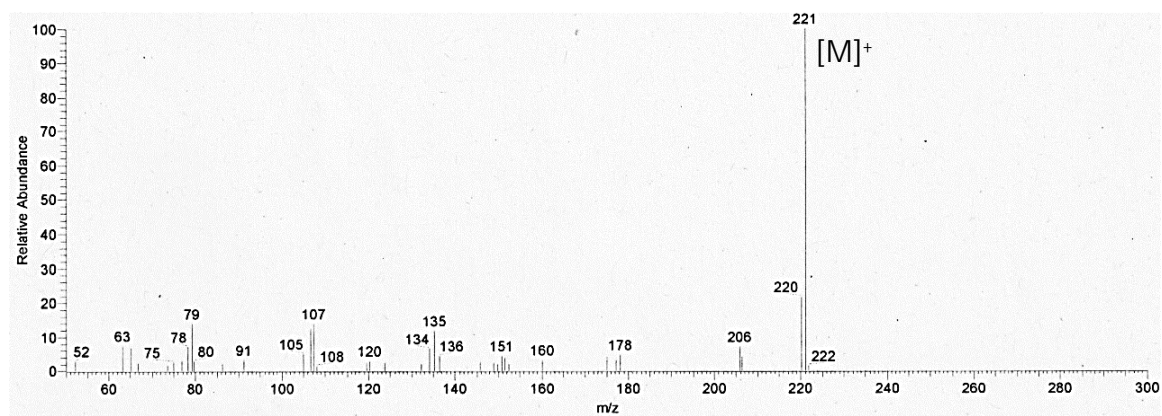

**Figure S3.** EI-MS spectrum of 2-(3,4-dimethoxybenzyl)-2-oxazoline (**1c**).

Microwave-assisted cationic ring-opening polymerizations of 2-ethyl-2-oxazoline (**1a**), protected catechol-substituted 2-oxazolines (**1b**, **1c**, and **1d**) and pyrogallol-substituted 2-oxazolines (**1b'** and **1d'**) in acetonitrile solution ( $[\text{monomer}]_0 = 1 \text{ M}$ ,  $[\text{monomer}]_0/[\text{MeOTos}]_0 = 25$ ) at  $100 \text{ }^\circ\text{C}$ .

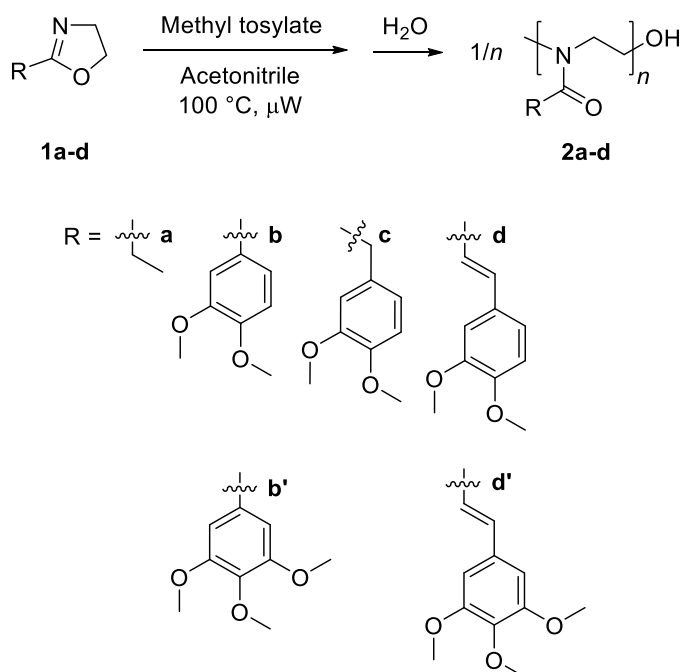

**Table S1.** Molecular characteristics of the polymers **2a-d** obtained by microwave-assisted cationic ring-opening polymerization of the 2-oxazoline monomers **1a-d** and **1b'-d'**.

|            | Time<br>(min) | Conversion<br>(%) <sup>a</sup> | $M_n^{\text{calc}}$<br>( $\text{kg mol}^{-1}$ ) <sup>b</sup> | $M_n^{\text{app}}$<br>( $\text{kg mol}^{-1}$ ) <sup>c</sup> | $\bar{D}$ <sup>d</sup> | $M_n^{\text{MS}}$<br>( $\text{kg mol}^{-1}$ ) <sup>e</sup> |
|------------|---------------|--------------------------------|--------------------------------------------------------------|-------------------------------------------------------------|------------------------|------------------------------------------------------------|
| <b>2a</b>  | 64            | 96                             | 2.4                                                          | 2.6                                                         | 1.28                   | 2.7                                                        |
| <b>2b</b>  | 480           | 93                             | 4.8                                                          | 3.2                                                         | 1.26                   | 4.2                                                        |
| <b>2b'</b> | 480           | 99                             | 5.9                                                          | 3.5                                                         | 1.23                   | 4.3                                                        |
| <b>2c</b>  | 64            | 94                             | 5.3                                                          | 3.7                                                         | 1.22                   | 4.1                                                        |
| <b>2d</b>  | 128           | 99                             | 5.8                                                          | 3.5                                                         | 1.22                   | 4.7                                                        |
| <b>2d'</b> | 128           | 97                             | 6.5                                                          | 4.1                                                         | 1.20                   | 5.4                                                        |

<sup>a</sup> Determined by FT-IR spectroscopy. <sup>b</sup> Expected molar mass, as calculated by  $25 \times M_{\text{monomer}} \times \text{conversion} + 32$ . <sup>c</sup> Apparent number-average molar mass determined by SEC with polystyrene calibration. <sup>d</sup> Dispersity index determined by SEC. <sup>e</sup> Number-average molar mass determined by MALDI-TOF mass spectrometry (see Fig. S5).

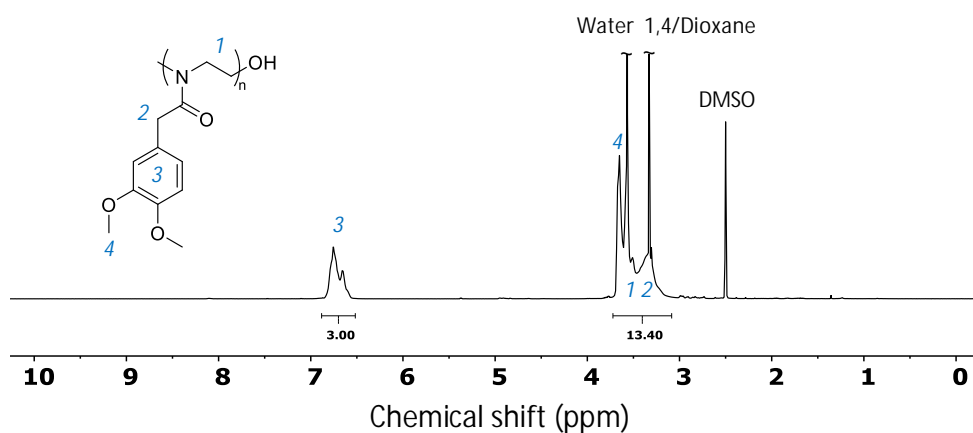

**Figure S4.**  $^1\text{H}$  NMR (400 MHz) spectrum of poly[2-(3,4-dimethoxybenzyl)-2-oxazoline] (**2c**) in  $\text{DMSO-}d_6$ .

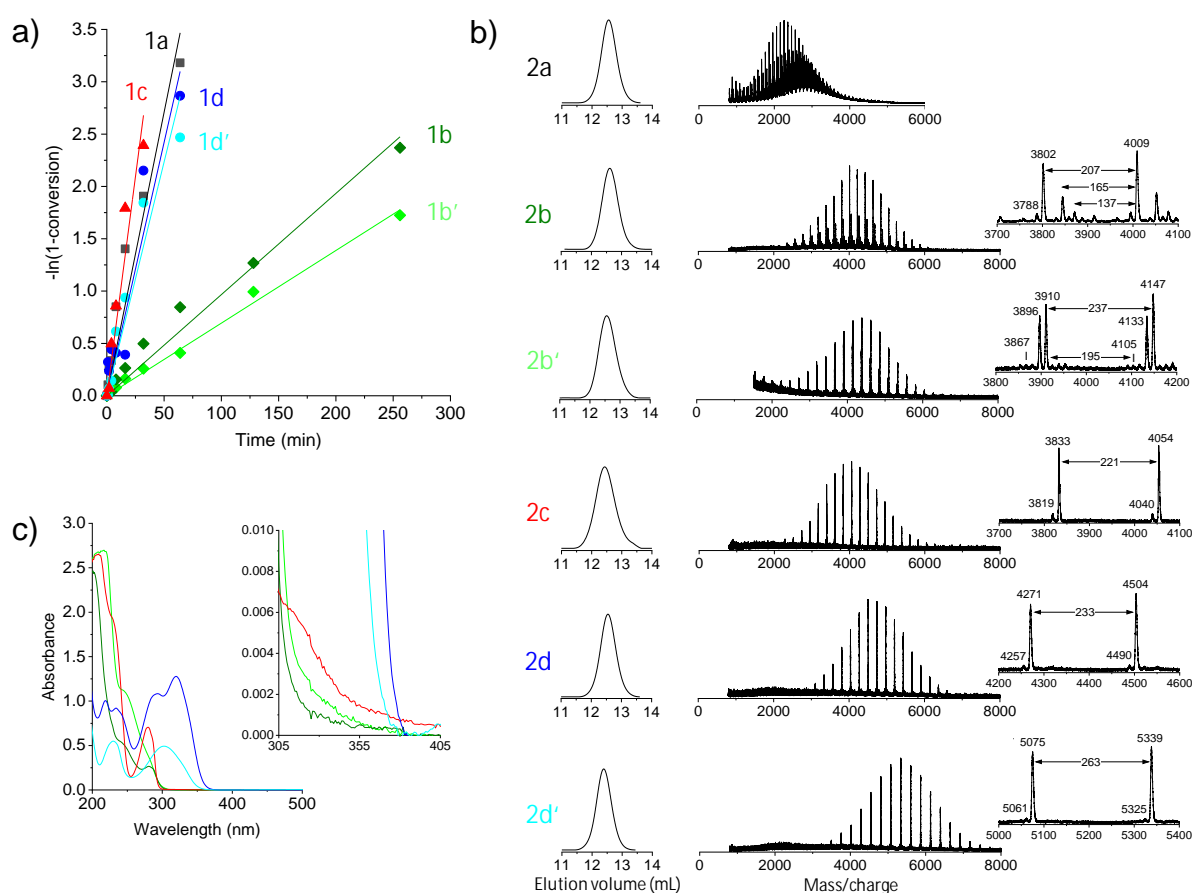

**Figure S5.** (a) First-order time conversion plots for the microwave-assisted polymerizations of **1a**, **1b**, **1b'**, **1c**, **1d**, and **1d'** ( $[\text{monomer}]_0 = 1 \text{ M}$ ,  $[\text{monomer}]_0/[\text{MeOTos}]_0 = 25$ ) in acetonitrile solution at  $100^\circ\text{C}$ . (b) SEC-RI traces (NMP) (left) and MALDI-TOF mass spectra (DCTB,  $\text{K}^+$ ) (right) of the polymers **2a**, **2b**, **2b'**, **2c**, **2d**, and **2d'** obtained at the end of kinetic experiments. (c) UV-visible spectra of the polymers in acetonitrile solution (**2b**, **2b'**, and **2c**  $0.05 \text{ mg mL}^{-1}$ , **2d** and **2d'**  $0.01 \text{ mg mL}^{-1}$ ).

Microwave-assisted cationic ring-opening copolymerizations of 2-ethyl-2-oxazoline (**1a**) with either 2-(3,4-dimethoxyphenyl)-2-oxazoline (**1b**) (90:10), 2-(3,4-dimethoxybenzyl)-2-oxazoline (**1c**) (90:10), or 2-(3,4-dimethoxycinnamyl)-2-oxazoline (**1d**) (90:10) in acetonitrile solution ( $[\text{monomer}]_0 = 1 \text{ M}$ ,  $[\text{monomer}]_0/[\text{MeOTos}]_0 = 100$ ) at  $100 \text{ }^\circ\text{C}$ .

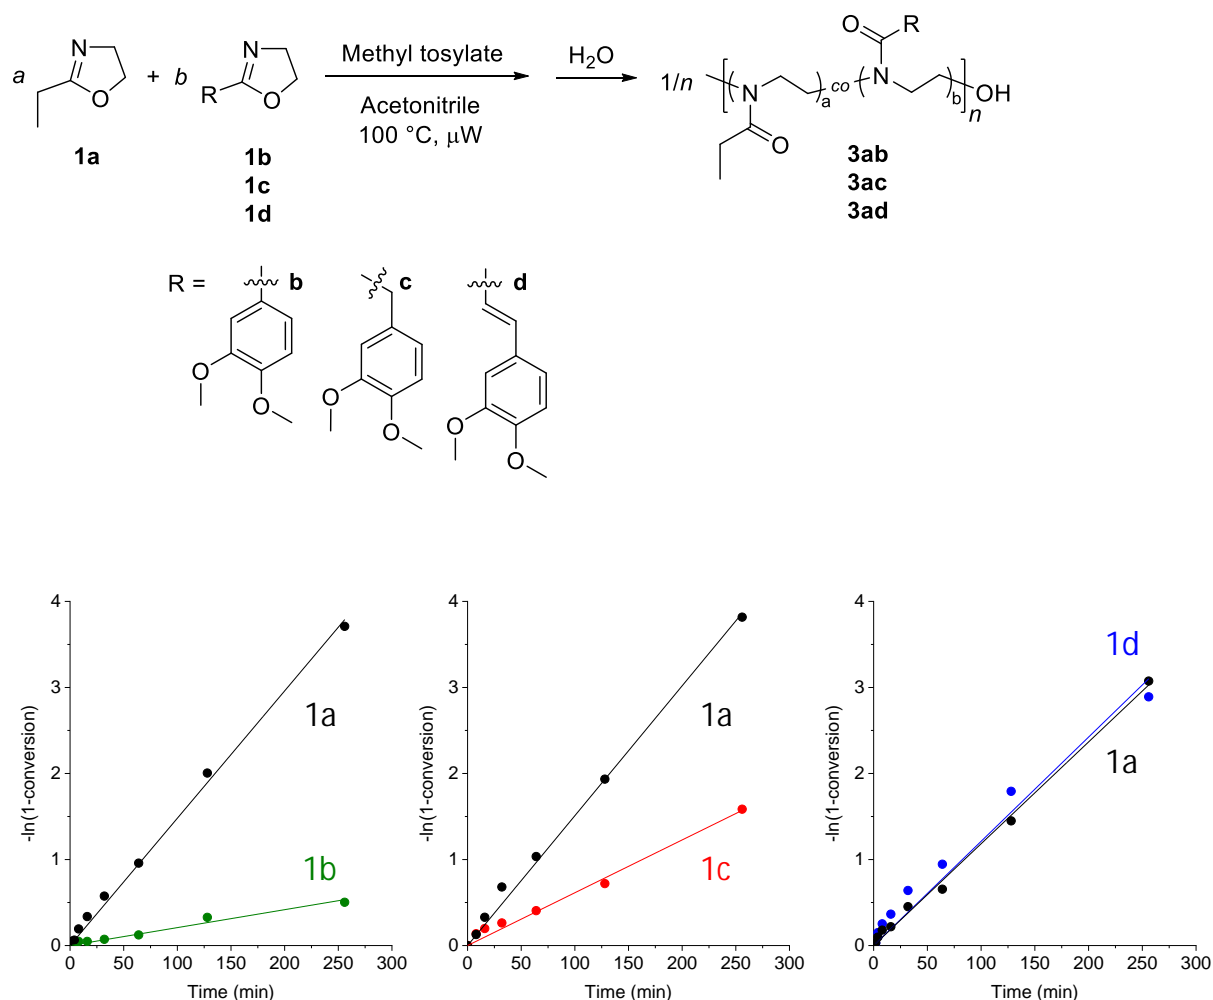

**Figure S6.** Pseudo first-order time-conversion plots for the microwave-assisted copolymerizations of 2-ethyl-2-oxazoline (**1a**) with either 2-(3,4-dimethoxyphenyl)-2-oxazoline (**1b**) (90:10), 2-(3,4-dimethoxybenzyl)-2-oxazoline (**1c**) (90:10), or 2-(3,4-dimethoxy-cinnamyl)-2-oxazoline (**1d**) (90:10) in acetonitrile solution at  $100 \text{ }^\circ\text{C}$ . Monomer conversions were determined by  $^1\text{H}$  NMR spectroscopy (see Figs. S7-S9).

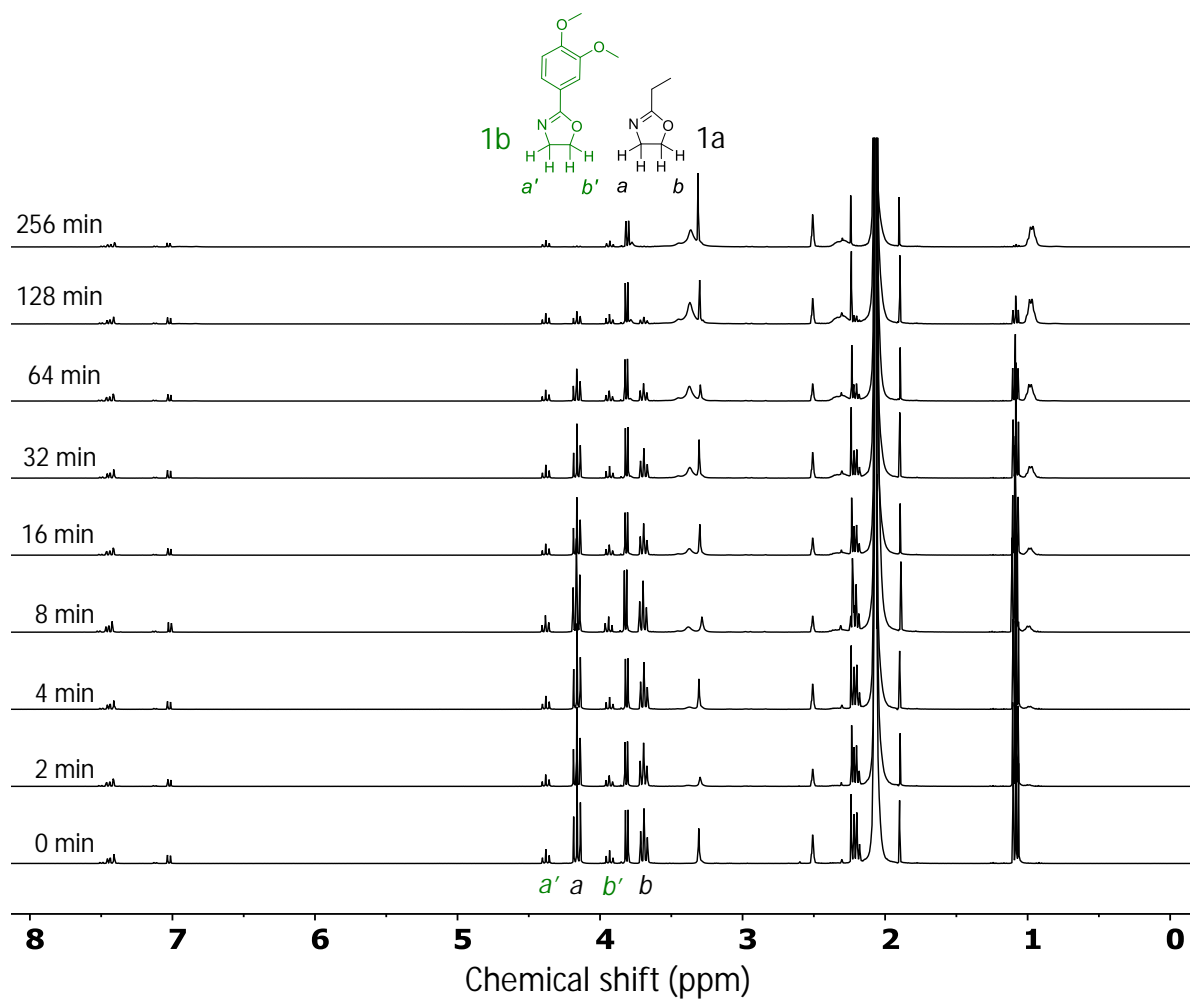

**Figure S7.**  $^1\text{H}$  NMR (400 MHz,  $\text{DMSO}-d_6$ ) spectra of crude reaction mixtures (terminated with water) obtained during the microwave-assisted copolymerization of 2-ethyl-2-oxazoline (**1a**) with 2-(3,4-dimethoxyphenyl)-2-oxazoline (**1b**) (90:10) in acetonitrile solution at 100 °C.

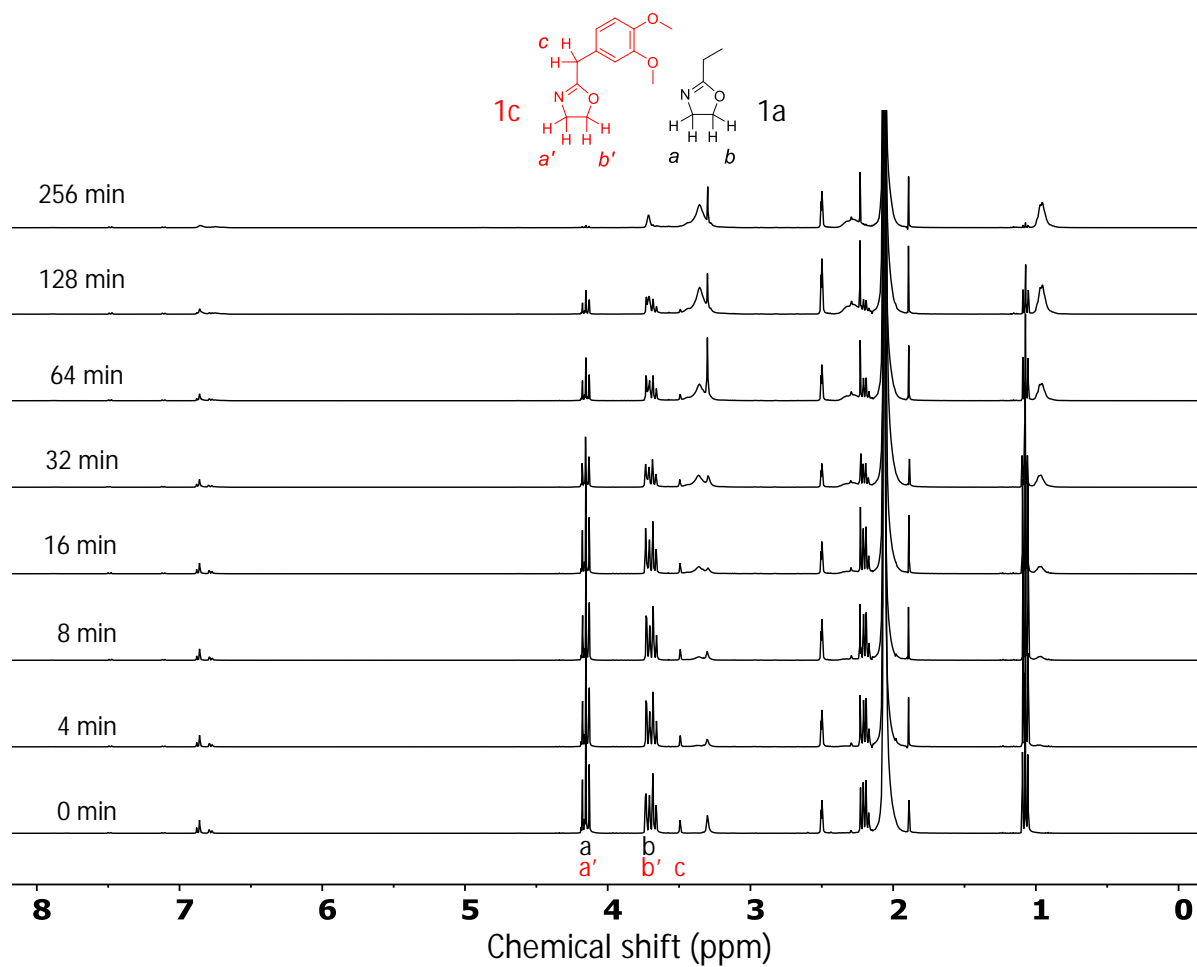

**Figure S8.** <sup>1</sup>H NMR (400 MHz, DMSO-*d*<sub>6</sub>) spectra of crude reaction mixtures (terminated with water) obtained during the microwave-assisted copolymerization of 2-ethyl-2-oxazoline (**1a**) and 2-(3,4-dimethoxybenzyl)-2-oxazoline (**1c**) (90:10) in acetonitrile solution at 100 °C.

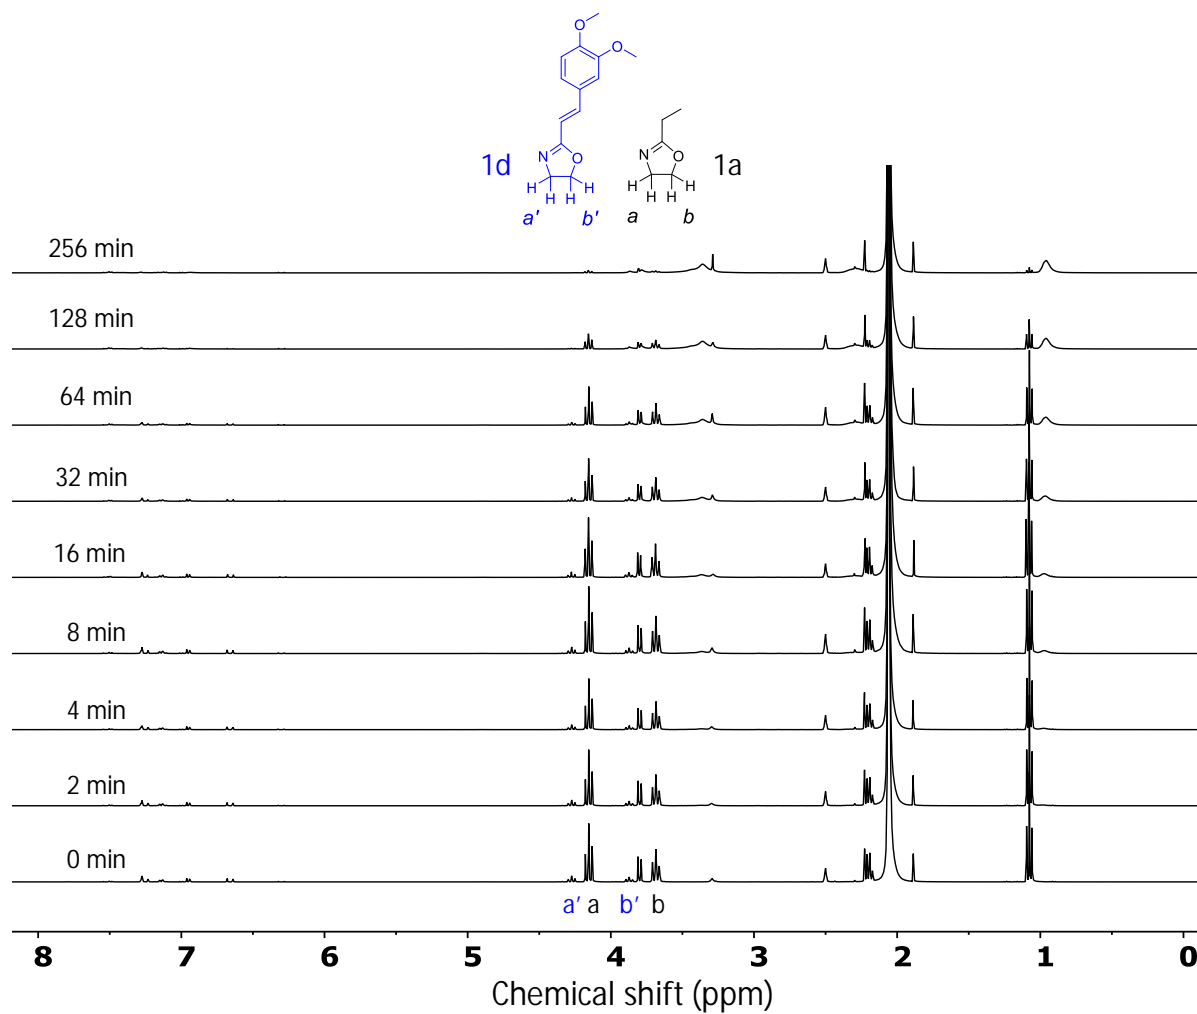

**Figure S9.** <sup>1</sup>H NMR (400 MHz, DMSO-*d*<sub>6</sub>) spectra of crude reaction mixtures (terminated with water) obtained during the microwave-assisted copolymerization of 2-ethyl-2-oxazoline (**1a**) and 2-(3,4-dimethoxycinnamyl)-2-oxazoline (**1d**) (90:10) in acetonitrile solution at 100 °C.



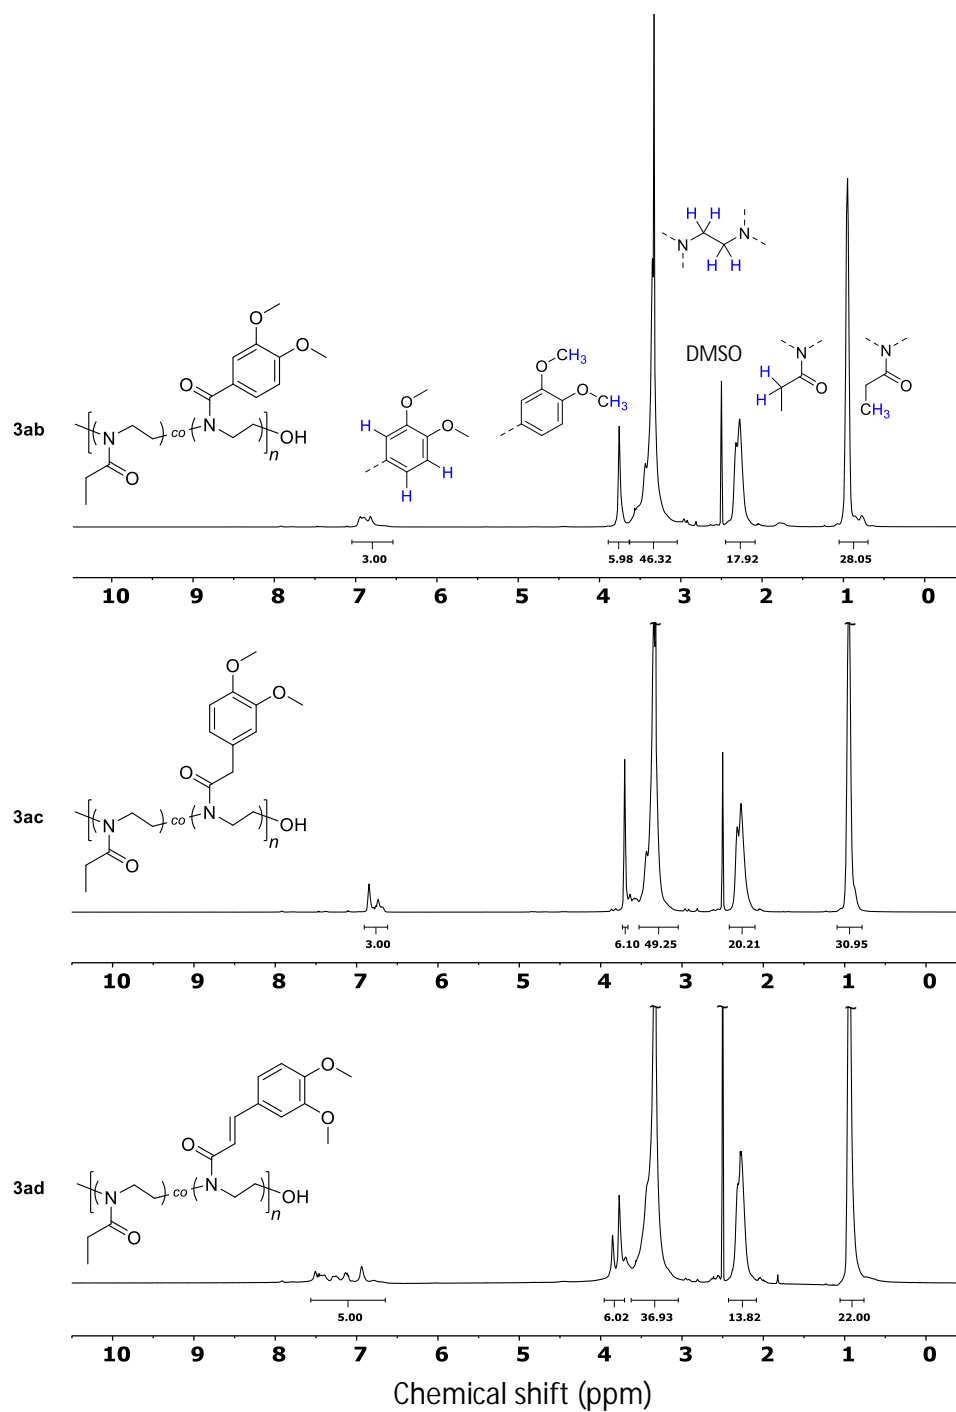

**Figure S10.**  $^1\text{H}$  NMR (400 MHz,  $\text{DMSO-}d_6$ ) spectra of the isolated copolymers **3ab**, **3ac**, and **3ad** obtained by microwave-assisted copolymerization of 2-ethyl-2-oxazoline (**1a**) with either 2-(3,4-dimethoxyphenyl)-2-oxazoline (**1b**) (90:10) (a-c), 2-(3,4-dimethoxybenzyl)-2-oxazoline (**1c**) (90:10) (d-f), or 2-(3,4-dimethoxycinnamyl)-2-oxazoline (**1d**) (90:10) in acetonitrile solution at 100 °C.

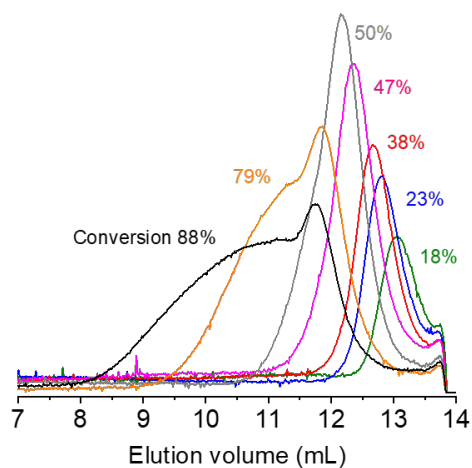

**Figure S11.** SEC-RI traces of the copolymers obtained during the microwave-assisted copolymerization of 2-ethyl-2-oxazoline (**1a**) and 2-(3,4-dimethoxycinnamyl)-2-oxazoline (**1d**) (75:25) in acetonitrile solution at 100 °C.

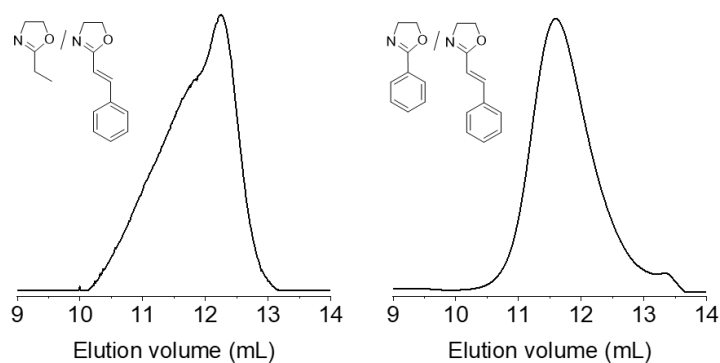

**Figure S12.** SEC-RI traces of the copolymers obtained by microwave-assisted copolymerization of 2-ethyl-2-oxazoline/2-cinnamyl-2-oxazoline (75:25) (left) and 2-phenyl-2-oxazoline/2-cinnamyl-2-oxazoline (75:25) (right).

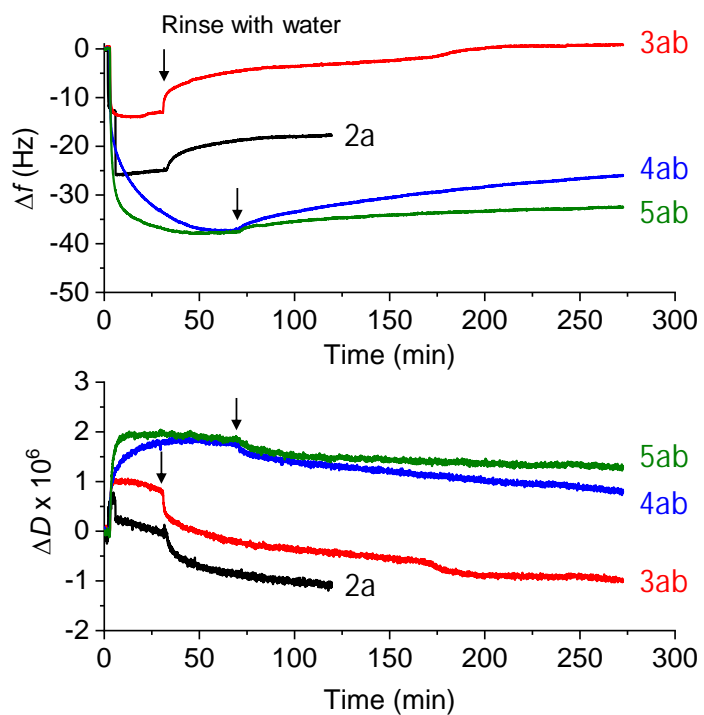

**Figure S13.** QCM-D measurement: Time-dependent change of frequency ( $\Delta f$ ) (top) and of dissipation ( $\Delta D$ ) (bottom) during the coating of a gold surface with the polymers **2a**, **3ab**, **4ab**, and **5ab**.
